# Supplementary material for: A closer examination of white-rot fungal mycelia assisted wood bonding
Source: Royal Society of Chemistry journal article supplement (doi:10.1039/d4lf00061g), 2024-01-01
Supplement: d4lf00061g1.pdf [file d4lf00061g1.pdf]

## A closer examination of white-rot fungal mycelia assisted wood bonding

Wenjing Sun,<sup>\*a,b</sup> Islam Hafez<sup>b,c</sup>, Barbara J.W. Cole<sup>d</sup>, and Mehdi Tajvidi<sup>b</sup>

<sup>a</sup> Institute of Materials (IMX), École Polytechnique Fédérale de Lausanne (EPFL), Lausanne 1015, Switzerland.

<sup>b</sup> Laboratory of Renewable Nanomaterials, School of Forest Resources, University of Maine, Nutting Hall, Orono, Maine 04469-5755, USA

<sup>c</sup> Department of Wood Science and Engineering, Oregon State University, Corvallis, Oregon 97331, USA

<sup>d</sup> Department of Chemistry, University of Maine, Orono, Maine, 04469-5755, USA

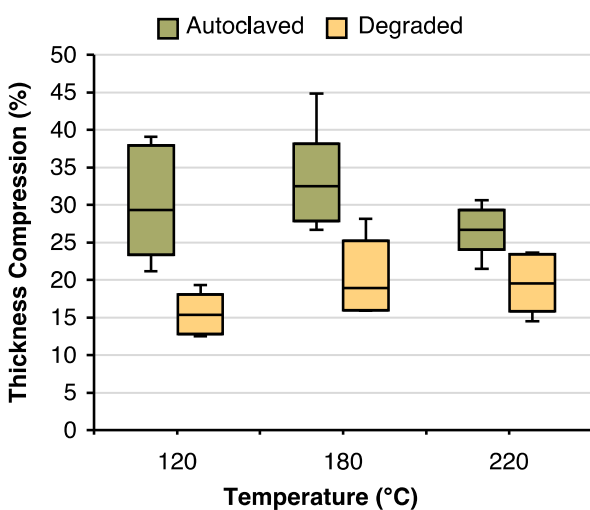

Fig. S1 Thickness compression of veneers after compression at different temperatures

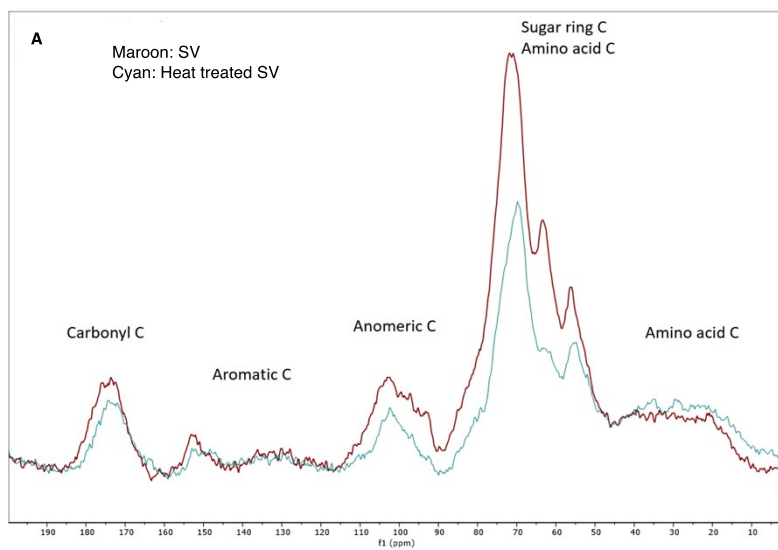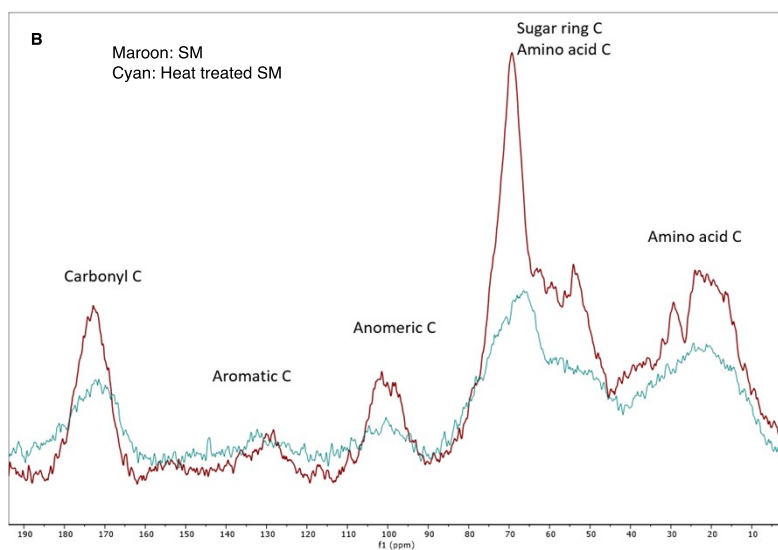

Fig. S2  $^{13}\text{C}$ -NMR spectra of SV (A) and SM (B) before and after heat treatment.

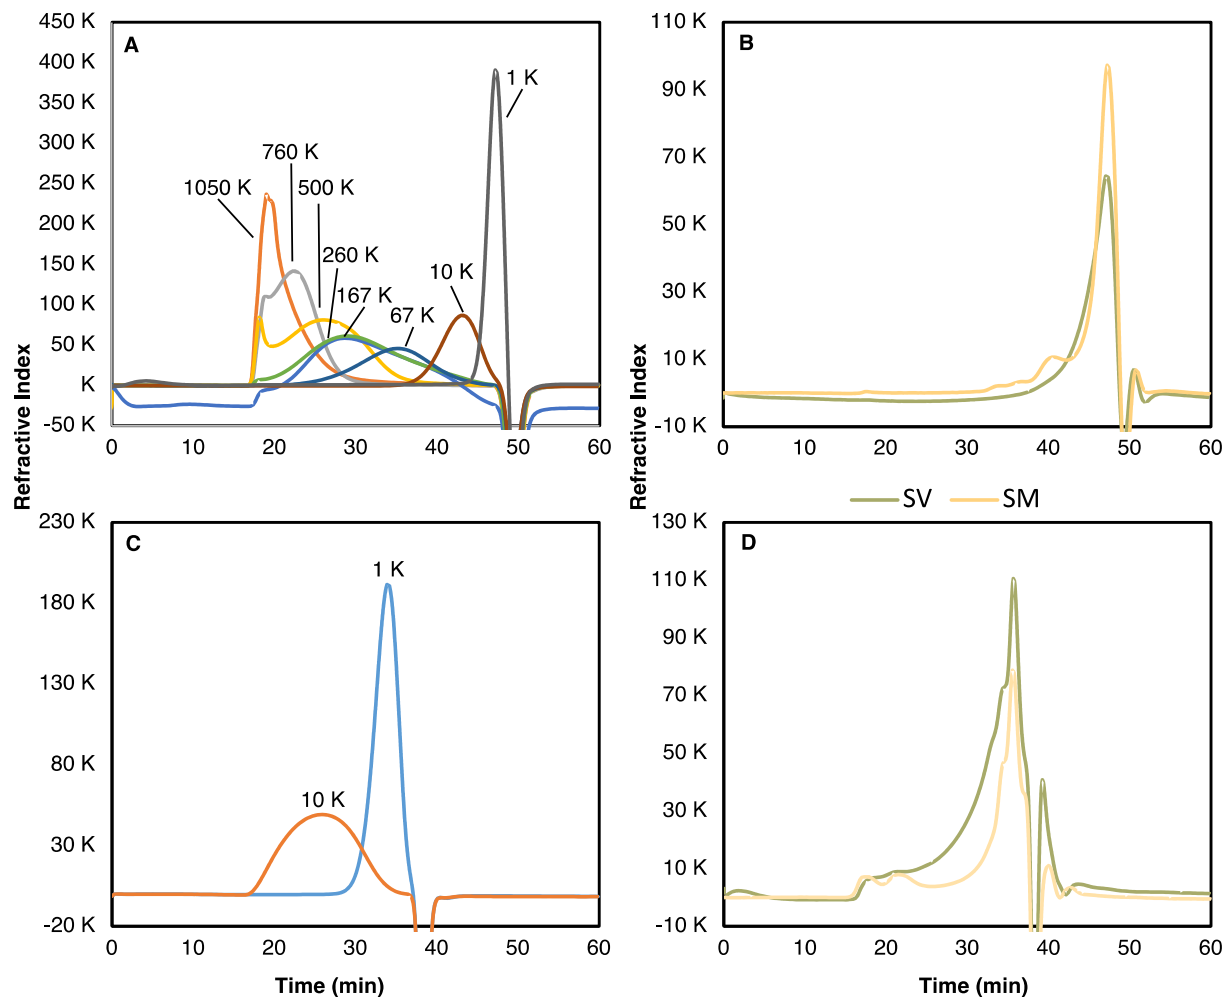

Fig. S3 SEC chromatograms of dextran standards (A, C) and the two samples (B, D) on a Superose-6 SEC column (A, B) and a Superdex-75 SEC column (C, D) monitored with a reflective index detector. The values in the top panel are the average molecular weights of corresponding dextran standards.

### One-Dimensional Carbon-13 Nuclear Magnetic Resonance Spectroscopy

Aliquots of 50-60 mg of each sample were ground into fine powders and firmly packed into a 50- $\mu$ L rotor. The rotor was sealed with an insert and a rotor cap. One dimensional (1D)  $^{13}\text{C}$ -

NMR spectra were collected on a Bruker Neo 600 MHz system, equipped with a high-resolution magic-angle spinning (HRMAS) probe operated at 10000 Hz.

Specifically, the field was locked with NaOAc standard dissolved in D<sub>2</sub>O. Cross polarization (CP) was set up with <sup>13</sup>C-labeled glucose solid standard with a CP pulse sequence. With this setup, 1D <sup>13</sup>C spectra of each sample was collected with 720 scans (1 hr), which was repeated 17 times (Total 18 spectra per sample). The 18 spectra of each sample were processed, referenced to the <sup>13</sup>C spectrum of glucose standard, and summed as the final <sup>13</sup>C spectrum with MestReNova X64.

### **Size measurement using size-exclusion chromatography (SEC)**

Size measurement of the samples was conducted using size-exclusion chromatography (SEC). Briefly, dextran standards were separated on an SEC column to obtain a correlation between the molecular weights and retention times. The molecular weight of the sample was estimated based on the retention times of dextran standards.

An analytical Superose 6 column (10 × 300 mm, GE Healthcare Life Sciences) and an analytical Superdex - 75 column were used for the measurement, which was eluted with 50 mM ammonium acetate buffer, on an Agilent 1260 Infinity II LC system (Agilent) operated at a flow rate of 0.45 mL/min and monitored with a refractive index detector. One hundred or 200 micrograms of the sample or dextran standards were loaded and separated on the column for analysis.
